# Supplementary material for: Morpho-physiological effects of environmental stress on yield and quality of sweet corn varieties (Zea mays L.)
Source: PeerJ. 2021 Dec 15;9:e12613. doi: 10.7717/peerj.12613 (PMC8684323; doi:10.7717/peerj.12613)
Supplement: Supplemental Information 1 [file peerj-09-12613-s001.xlsx]

## Sheet: 2019 data
Reiteration	Varieties	Abscisic acid (nmol/g-1 DW)	Plant height (cm)	Fresh cob yield (t/ha-1)	Ear length (cm)	number of grains per cob (grain/Cob)	pollen fertility rate(%)	total soluble solids (0Brix)
1	ŞADA-18.1	9.22	119.6	8.01	13.98	324.55	44.22	19.13
1	ŞADA-18.2	7.55	110	5.73	12.34	312.54	43.22	16.32
1	ŞADA-18.3	15.44	160.26	10.81	16.12	381.22	58.77	12.35
1	ŞADA-18.4	9.44	133.6	8.87	14.11	345.66	51.77	16.77
1	ŞADA-18.5	13.22	140.93	9.73	15.1	370	56.11	13.22
1	ŞADA-18.6	12.36	148.6	9.42	14.77	352.43	52.11	14.55
1	ŞADA-18.7	14.33	180.26	13.15	18.77	444.23	64.33	15.44
1	ŞADA-18.8	20.49	153.6	9.87	16.23	362.77	54.33	13.22
1	Control-1	17.66	165.26	11.54	18.65	396.45	72.33	9.8
1	Control-2	18.44	177.1	9.42	16.55	455.78	75.45	19
2	ŞADA-18.1	8.77	106	6.9	12.54	291.22	42.33	17.66
2	ŞADA-18.2	5.12	123.6	7.01	13.11	333.56	45.66	17.66
2	ŞADA-18.3	16.55	151.45	9.52	15.44	363.22	54.44	14.55
2	ŞADA-18.4	11.22	120	7.42	13.55	327.88	44.33	14.55
2	ŞADA-18.5	14.55	131.22	8.31	13.22	352.12	54.33	14.55
2	ŞADA-18.6	11.45	127.1	5.97	14	321.33	50.34	13.24
2	ŞADA-18.7	13.22	166.66	11.02	16.76	432.45	61.22	14
2	ŞADA-18.8	18.77	140	8.64	14.66	356.77	56.77	11.45
2	Control-1	15.44	151.66	8.52	15.77	360	68.77	12.78
2	Control-2	15.44	198.6	11.53	15.44	432.45	71.22	21
3	ŞADA-18.1	6.12	98.1	5.01	11.34	281.44	46.44	15.16
3	ŞADA-18.2	4.33	102.1	3.73	11	291.45	47.66	19.12
3	ŞADA-18.3	14.33	146.66	7.87	14.06	356.77	61.22	11
3	ŞADA-18.4	14.34	112.1	5.87	12.43	311.22	42.55	17.56
3	ŞADA-18.5	16.55	116.55	6.73	14.33	340.55	51.22	16
3	ŞADA-18.6	14.55	135	7.59	12.55	344.55	48.77	15.45
3	ŞADA-18.7	15.45	158.76	9.85	17.54	408.43	58.77	17.67
3	ŞADA-18.8	19	132.1	7.38	13.16	341.23	60.99	15.43
3	Control-1	18.33	158.76	10.58	17.05	377.88	65.44	13.16
3	Control-2	16.57	185	10.52	17.67	411.22	68.77	18.34

## Sheet: 2020-data
Reiteration	Varieties	Abscisic acid (nmol/g-1 DW)	Plant height (cm)	Fresh cob yield (t/ha-1)	Ear length (cm)	number of grains per cob (grain/cob)	pollen fertility rate(%)	total soluble solids (0Brix)
1	ŞADA-18.1	10.22	86.44	4.21	5.9	271.22	38.77	19.88
1	ŞADA-18.2	9.45	83.33	2.89	8.91	281.56	35.44	20.12
1	ŞADA-18.3	19.88	129.23	7.73	12.36	321.67	55.66	15.44
1	ŞADA-18.4	12.22	104.22	5.21	9.69	322.45	40.44	21.45
1	ŞADA-18.5	14.34	110.11	5.31	11.24	285.66	48.77	19.88
1	ŞADA-18.6	15.34	119.77	3.4	9.9	267.45	44.33	16.34
1	ŞADA-18.7	22.33	150	9.91	15.02	415.45	56.44	21.65
1	ŞADA-18.8	21.33	121.44	5.91	11.68	333.67	53.12	16.34
1	Control-1	22.33	148.78	6.13	14.67	361.67	62.99	11.34
1	Control-2	18.12	156.66	7.82	12.91	356.23	61.77	22.33
2	ŞADA-18.1	12.45	93.33	4.92	7.91	291.22	40.22	17.66
2	ŞADA-18.2	11.22	75.55	3.41	10.57	243.12	32.56	18.77
2	ŞADA-18.3	17.33	140.11	6.83	9.57	330.54	52.33	13.22
2	ŞADA-18.4	14.56	110.23	4.57	7.24	356.45	42.56	19.88
2	ŞADA-18.5	17.99	113.33	3.7	10.35	300.67	51	21.77
2	ŞADA-18.6	17.66	126.44	3.83	8.8	233.67	46.67	18.99
2	ŞADA-18.7	24.55	141.23	9.19	12.57	445.77	58.23	25.77
2	ŞADA-18.8	22.55	130.34	6.82	12.68	312.78	50.99	14
2	Control-1	19.23	136.66	7.04	12.79	330	58	15.56
2	Control-2	16.55	144.23	8.47	13.9	421.23	63.22	20.57
3	ŞADA-18.1	13.67	100.23	3.25	6.46	322.56	36.45	18
3	ŞADA-18.2	8.77	92.22	2.15	8.12	272.67	37.21	21.56
3	ŞADA-18.3	18	145.55	6.02	13.68	292.13	57.66	17.05
3	ŞADA-18.4	16	96.44	5.82	7.01	288.99	44.11	17.66
3	ŞADA-18.5	19.12	120	5.74	8.68	317.55	52.22	18
3	ŞADA-18.6	14.33	116.12	3.15	7.24	312.56	49.11	19.67
3	ŞADA-18.7	25.45	154.34	8.24	15.24	375.66	60.99	26
3	ŞADA-18.8	24.12	136.44	5.24	13.79	305.44	54.67	18.12
3	Control-1	17.22	134.12	8.21	13.92	320.56	57.12	16.77
3	Control-2	17.34	166.44	9.36	14.47	400.88	65.45	24.13

## Sheet: interaction
years	Reiteration	Varieties	Plant height (cm)	Ear length (cm)	number of grains per cob (grain/Cob)	Fresh cob yield (t/ha-1)	pollen fertility rate(%)	total soluble solids (0Brix)	Abscisic acid (nmol/g-1 DW)
2019	1	ŞADA-18.1	119.6	13.98	324.55	8.01	44.22	19.13	9.22
2019	1	ŞADA-18.2	110	12.34	312.54	5.73	43.22	16.32	7.55
2019	1	ŞADA-18.3	160.26	16.12	381.22	10.81	58.77	12.35	15.44
2019	1	ŞADA-18.4	133.6	14.11	345.66	8.87	51.77	16.77	9.44
2019	1	ŞADA-18.5	140.93	15.1	370	9.73	56.11	13.22	13.22
2019	1	ŞADA-18.6	148.6	14.77	352.43	9.42	52.11	14.55	12.36
2019	1	ŞADA-18.7	180.26	18.77	444.23	13.15	64.33	15.44	14.33
2019	1	ŞADA-18.8	153.6	16.23	362.77	9.87	54.33	13.22	20.49
2019	1	Control-1	165.26	18.65	396.45	11.54	72.33	9.8	17.66
2019	1	Control-2	177.1	16.55	455.78	9.42	75.45	19	18.44
2019	2	ŞADA-18.1	106	12.54	291.22	6.9	42.33	17.66	8.77
2019	2	ŞADA-18.2	123.6	13.11	333.56	7.01	45.66	17.66	5.12
2019	2	ŞADA-18.3	151.45	15.44	363.22	9.52	54.44	14.55	16.55
2019	2	ŞADA-18.4	120	13.55	327.88	7.42	44.33	14.55	11.22
2019	2	ŞADA-18.5	131.22	13.22	352.12	8.31	54.33	14.55	14.55
2019	2	ŞADA-18.6	127.1	14	321.33	5.97	50.34	13.24	11.45
2019	2	ŞADA-18.7	166.66	16.76	432.45	11.02	61.22	14	13.22
2019	2	ŞADA-18.8	140	14.66	356.77	8.64	56.77	11.45	18.77
2019	2	Control-1	151.66	15.77	360	8.52	68.77	12.78	15.44
2019	2	Control-2	198.6	15.44	432.45	11.53	71.22	21	15.44
2019	3	ŞADA-18.1	98.1	11.34	281.44	5.01	46.44	15.16	6.12
2019	3	ŞADA-18.2	102.1	11	291.45	3.73	47.66	19.12	4.33
2019	3	ŞADA-18.3	146.66	14.06	356.77	7.87	61.22	11	14.33
2019	3	ŞADA-18.4	112.1	12.43	311.22	5.87	42.55	17.56	14.34
2019	3	ŞADA-18.5	116.55	14.33	340.55	6.73	51.22	16	16.55
2019	3	ŞADA-18.6	135	12.55	344.55	7.59	48.77	15.45	14.55
2019	3	ŞADA-18.7	158.76	17.54	408.43	9.85	58.77	17.67	15.45
2019	3	ŞADA-18.8	132.1	13.16	341.23	7.38	60.99	15.43	19
2019	3	Control-1	158.76	17.05	377.88	10.58	65.44	13.16	18.33
2019	3	Control-2	185	17.67	411.22	10.52	68.77	18.34	16.57
2020	1	ŞADA-18.1	86.44	5.9	271.22	4.21	38.77	19.88	10.22
2020	1	ŞADA-18.2	83.33	8.91	281.56	2.89	35.44	20.12	9.45
2020	1	ŞADA-18.3	129.23	12.36	321.67	7.73	55.66	15.44	19.88
2020	1	ŞADA-18.4	104.22	9.69	322.45	5.21	40.44	21.45	12.22
2020	1	ŞADA-18.5	110.11	11.24	285.66	5.31	48.77	19.88	14.34
2020	1	ŞADA-18.6	119.77	9.9	267.45	3.4	44.33	16.34	15.34
2020	1	ŞADA-18.7	150	15.02	415.45	9.91	56.44	21.65	22.33
2020	1	ŞADA-18.8	121.44	11.68	333.67	5.91	53.12	16.34	21.33
2020	1	Control-1	148.78	14.67	361.67	6.13	62.99	11.34	22.33
2020	1	Control-2	156.66	12.91	356.23	7.82	61.77	22.33	18.12
2020	2	ŞADA-18.1	93.33	7.91	291.22	4.92	40.22	17.66	12.45
2020	2	ŞADA-18.2	75.55	10.57	243.12	3.41	32.56	18.77	11.22
2020	2	ŞADA-18.3	140.11	9.57	330.54	6.83	52.33	13.22	17.33
2020	2	ŞADA-18.4	110.23	7.24	356.45	4.57	42.56	19.88	14.56
2020	2	ŞADA-18.5	113.33	10.35	300.67	3.7	51	21.77	17.99
2020	2	ŞADA-18.6	126.44	8.8	233.67	3.83	46.67	18.99	17.66
2020	2	ŞADA-18.7	141.23	12.57	445.77	9.19	58.23	25.77	24.55
2020	2	ŞADA-18.8	130.34	12.68	312.78	6.82	50.99	14	22.55
2020	2	Control-1	136.66	12.79	330	7.04	58	15.56	19.23
2020	2	Control-2	144.23	13.9	421.23	8.47	63.22	20.57	16.55
2020	3	ŞADA-18.1	100.23	6.46	322.56	3.25	36.45	18	13.67
2020	3	ŞADA-18.2	92.22	8.12	272.67	2.15	37.21	21.56	8.77
2020	3	ŞADA-18.3	145.55	13.68	292.13	6.02	57.66	17.05	18
2020	3	ŞADA-18.4	96.44	7.01	288.99	5.82	44.11	17.66	16
2020	3	ŞADA-18.5	120	8.68	317.55	5.74	52.22	18	19.12
2020	3	ŞADA-18.6	116.12	7.24	312.56	3.15	49.11	19.67	14.33
2020	3	ŞADA-18.7	154.34	15.24	375.66	8.24	60.99	26	25.45
2020	3	ŞADA-18.8	136.44	13.79	305.44	5.24	54.67	18.12	24.12
2020	3	Control-1	134.12	13.92	320.56	8.21	57.12	16.77	17.22
2020	3	Control-2	166.44	14.47	400.88	9.36	65.45	24.13	17.34
